# Supplementary material
Source: ML conference proceedings conference paper supplement (https://www.ecva.net/papers/eccv_2020/papers_ECCV/html/123570443_ECCV_2020_paper.php)
Supplement: Supplementary file 1 [file 123570443-supp.pdf]

# Gradient-Induced Co-Saliency Detection

— *Supplemental File* —

## 1 More About Our *CoCA* Dataset

In the main paper, we demonstrate the main advantage of *CoCA*; that is, except for the co-salient object(s), each image contains at least one extraneous salient object, which enables the dataset to better evaluate the models' ability of discovering co-salient object(s) among multiple foregrounds. Due to the space limitation of the main paper, the more advantages of our proposed *CoCA* are shown in this section.

**High-quality labeling.** As shown in Fig. 1, our *CoCA* provides precise labeling. The detailed structure inside the object is accurately labeled, and the occlusion parts are carefully removed. High-quality annotations make the evaluation results of the dataset more credible.

**Label diversity.** The *CoCA* dataset provides four levels of annotations, including class level, bounding box level, object level, and instance level. In Fig. 2 and 3, we show some of the annotations of *CoCA*. Rich annotations expand the application scenarios of *CoCA*. The class-level annotations can serve the image-set classification task [3,5]. The bounding-box-level annotations can serve the co-localization task [2,6]. The object-level annotations can serve co-saliency detection and few-shot object segmentation [7,8]. The instance-level can be used for instance co-segmentation [5] and few-shot instance segmentation [1,4].

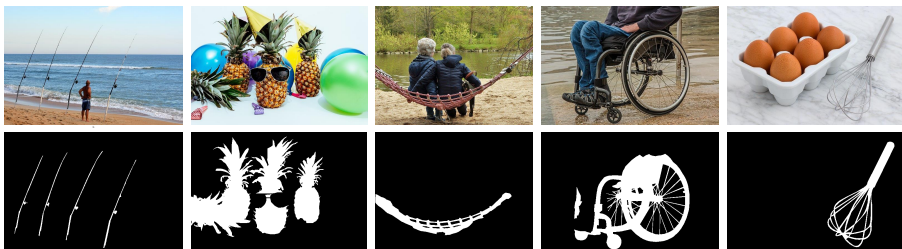

**Fig. 1.** High-quality labels of *CoCA*.

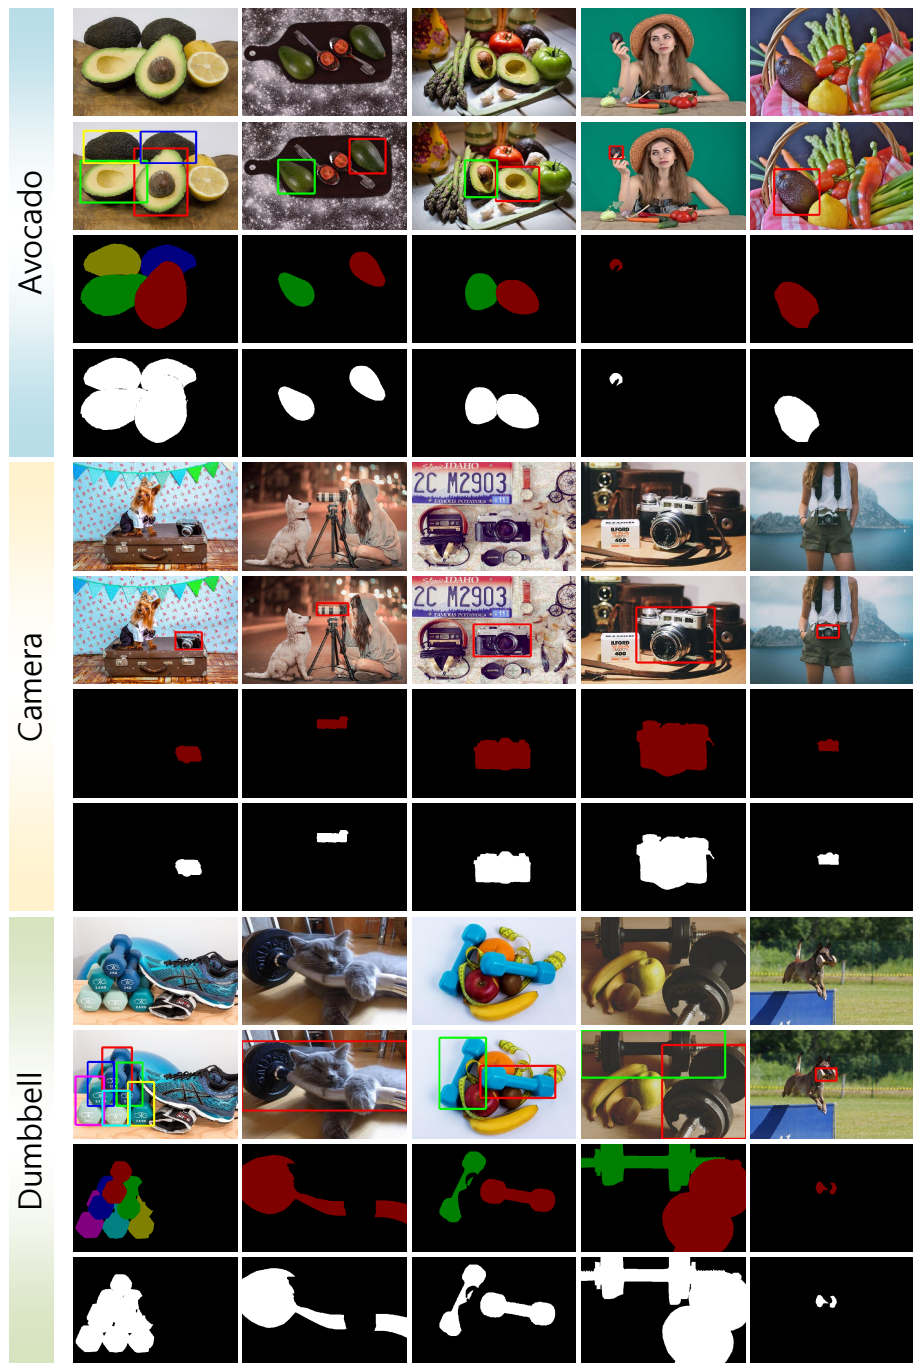

**Fig. 2.** Multi-level annotations of *CoCA*. It includes class level, bounding box level, object level, and instance level. (1/2)

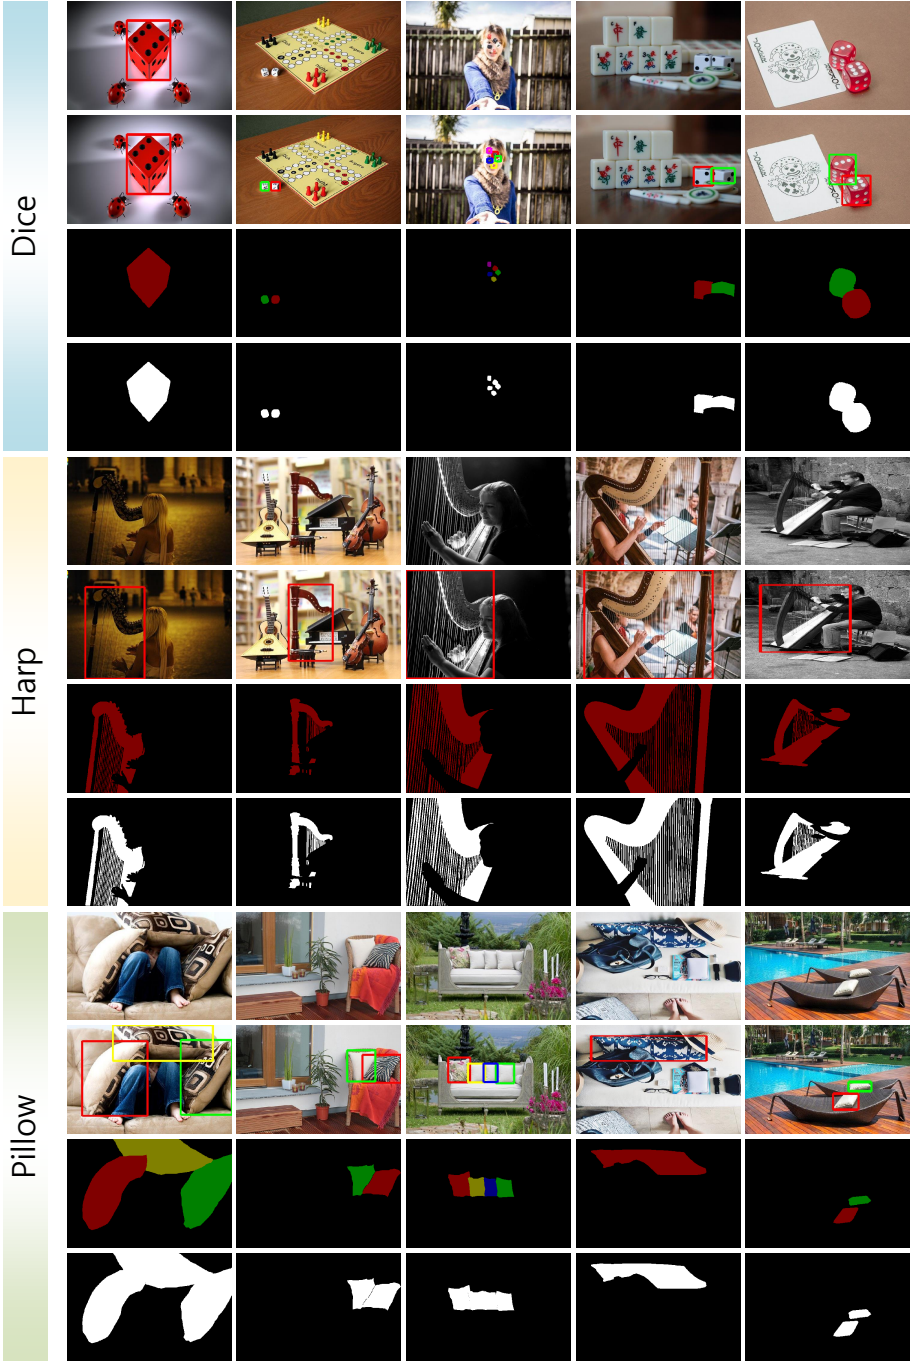

**Fig. 3.** Multi-level annotations of *CoCA*. It includes class level, bounding box level, object level, and instance level. (2/2)

## References

1. Gao, N., Shan, Y., Wang, Y., Zhao, X., Yu, Y., Yang, M., Huang, K.: SSAP: Single-shot instance segmentation with affinity pyramid. In: ICCV. pp. 642–651 (2019)
2. Joulin, A., Tang, K., Fei-Fei, L.: Efficient image and video co-localization with frank-wolfe algorithm. In: ECCV. pp. 253–268. Springer (2014)
3. Liu, B., Jing, L., Li, J., Yu, J., Gittens, A., Mahoney, M.W.: Group collaborative representation for image set classification. IJCV **127**(2), 181–206 (2019)
4. Michaelis, C., Ustyuzhaninov, I., Bethge, M., Ecker, A.S.: One-shot instance segmentation. CoRR **abs/1811.11507** (2018), <http://arxiv.org/abs/1811.11507>
5. Sun, H., Zhen, X., Zheng, Y., Yang, G., Yin, Y., Li, S.: Learning deep match kernels for image-set classification. In: CVPR. pp. 6240–6249 (2017)
6. Tang, K., Joulin, A., Li, L.J., Fei-Fei, L.: Co-localization in real-world images. In: CVPR. pp. 1464–1471 (2014)
7. Zhang, C., Lin, G., Liu, F., Yao, R., Shen, C.: CANet: Class-agnostic segmentation networks with iterative refinement and attentive few-shot learning. In: CVPR. pp. 5217–5226 (2019)
8. Zhang, X., Wei, Y., Yang, Y., Huang, T.: SG-One: Similarity guidance network for one-shot semantic segmentation (2018)
